# Supplementary material for: Antitumoral Activity of a CDK9 PROTAC Compound in HER2-Positive Breast Cancer
Source: MDPI journal article supplement (doi:10.3390/ijms23105476), 2022-05-13

**A**

Breast cancer cell lines

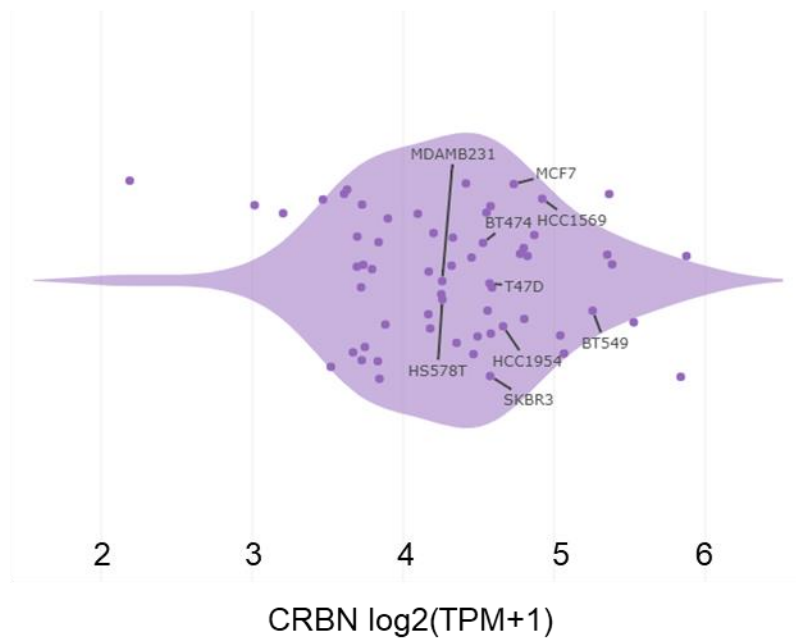

CRBN expression log2(TPM+1)

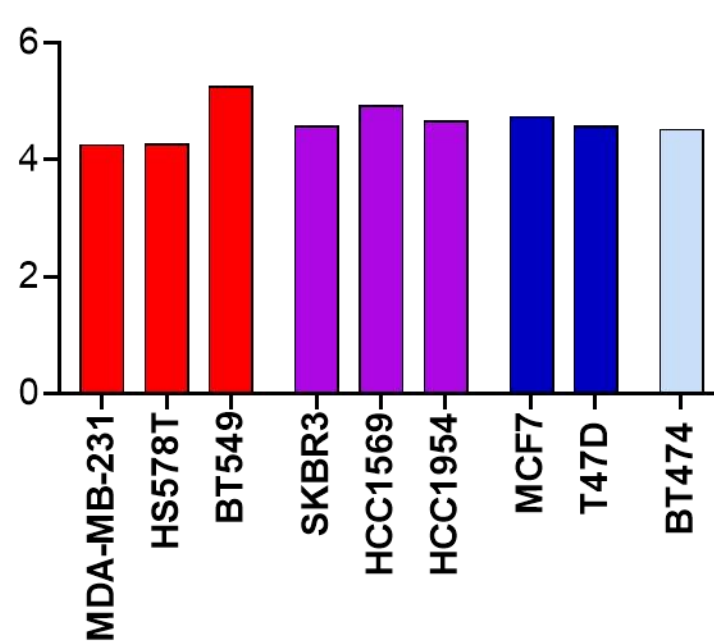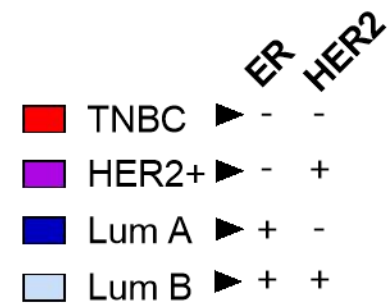**B**

Breast cancer cell lines

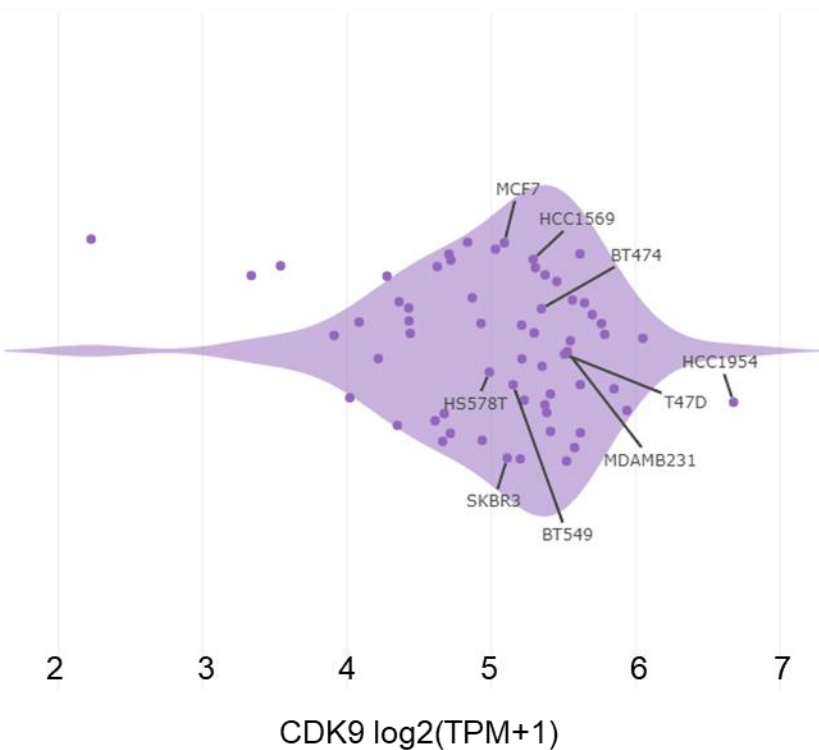

CDK9 expression log2(TPM+1)

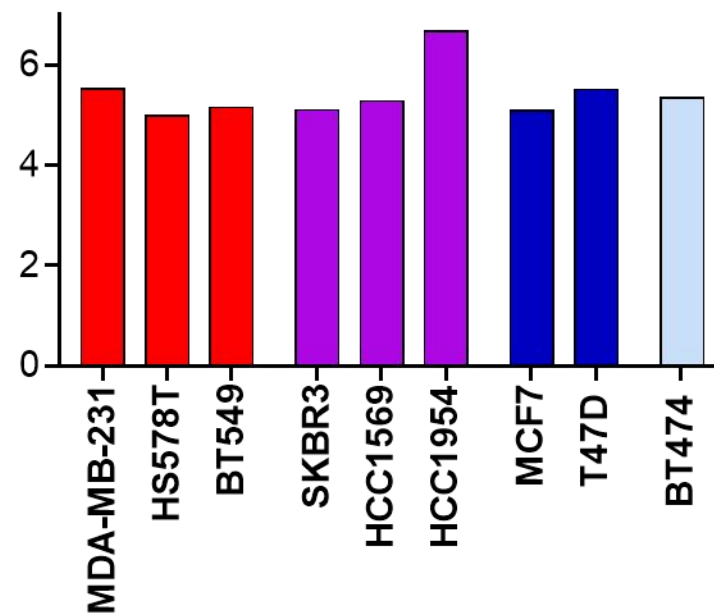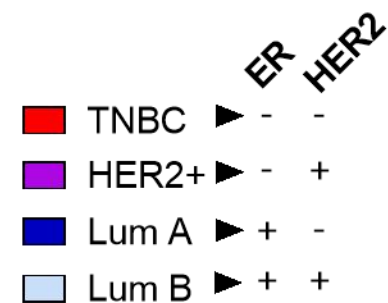

Supplement: s1 [file s1]
