# Supplementary figures and images for: Antitumoral Activity of a CDK9 PROTAC Compound in HER2-Positive Breast Cancer
Source: MDPI journal article supplement (doi:10.3390/ijms23105476), 2022-05-13

**A**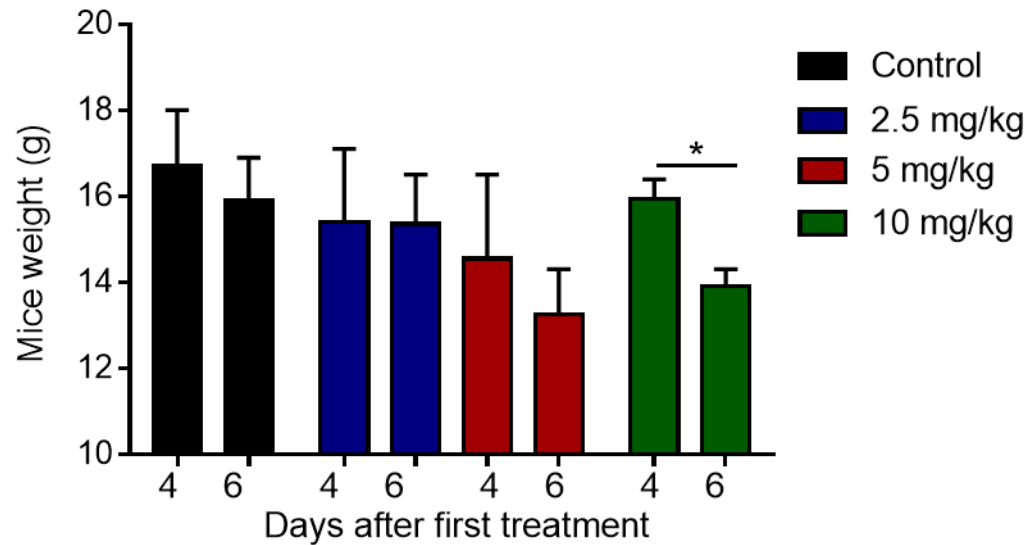**B**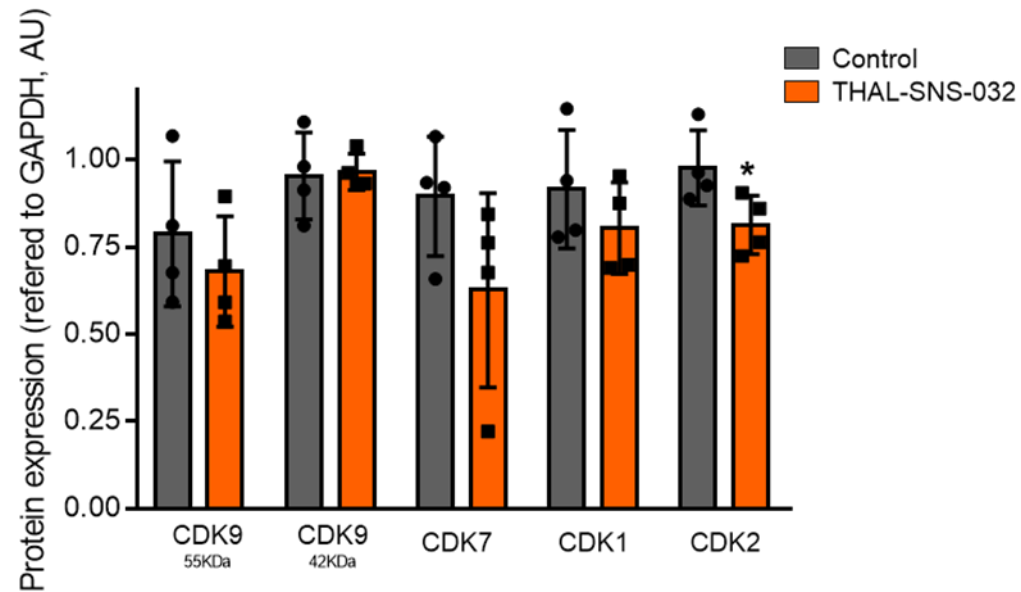

Supplement: s1 [file s1]

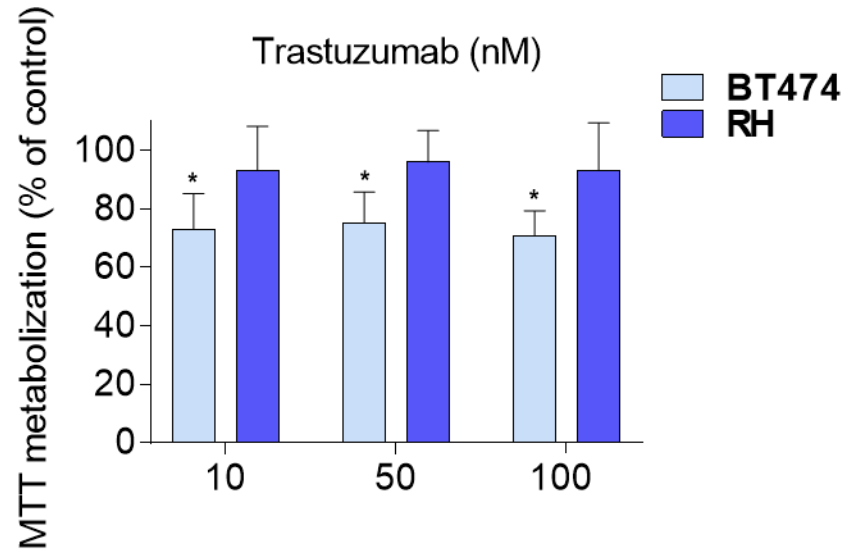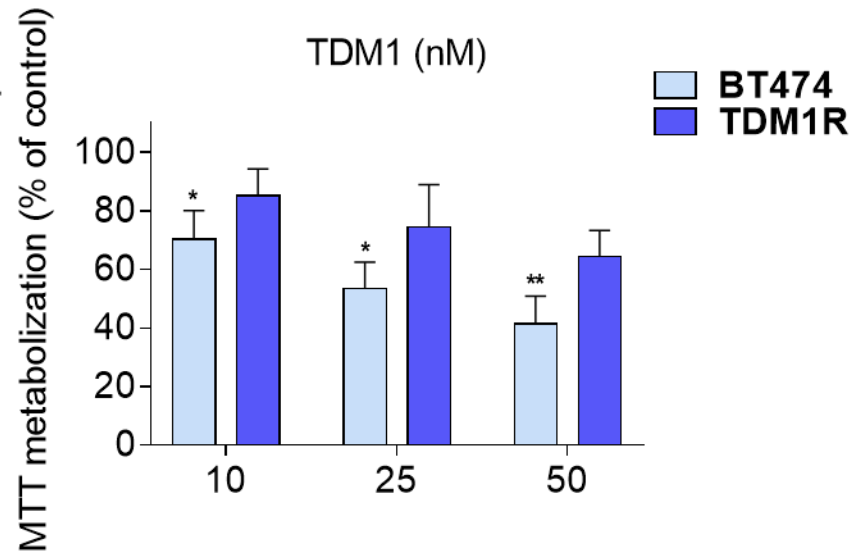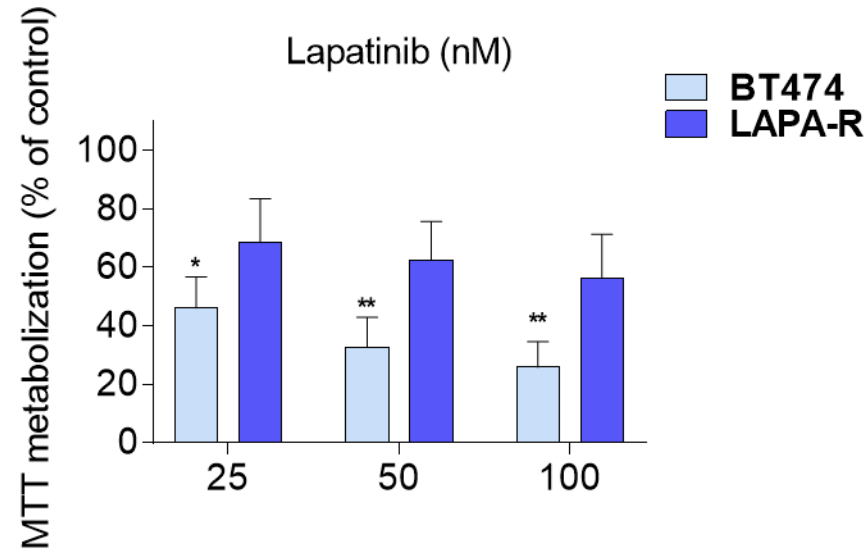

Supplement: s1 [file s1]

**A**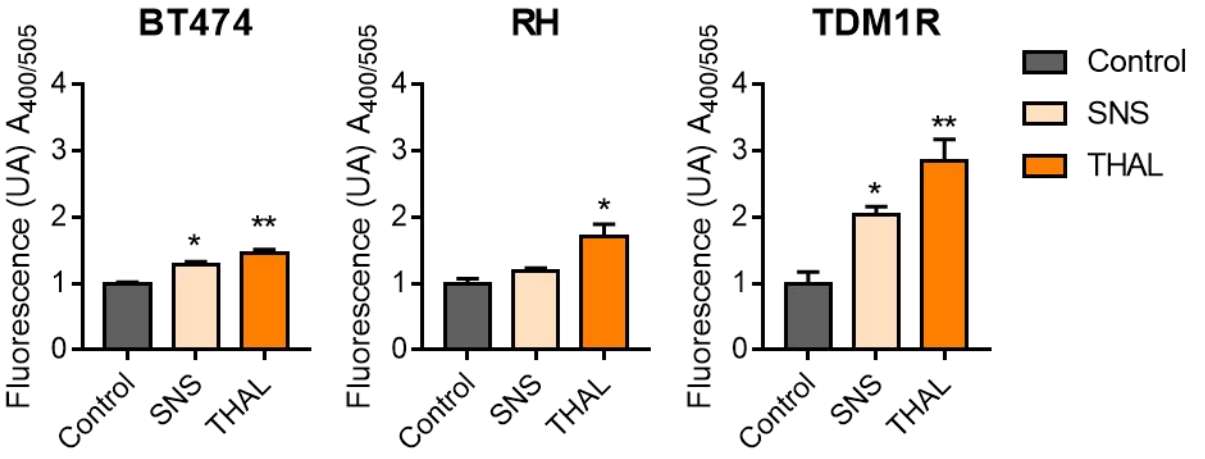**B**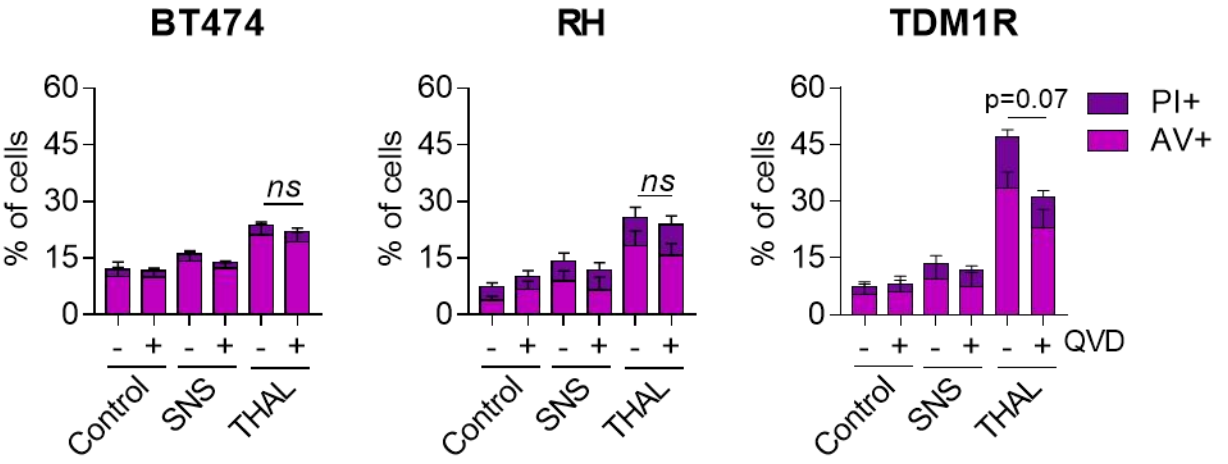**C**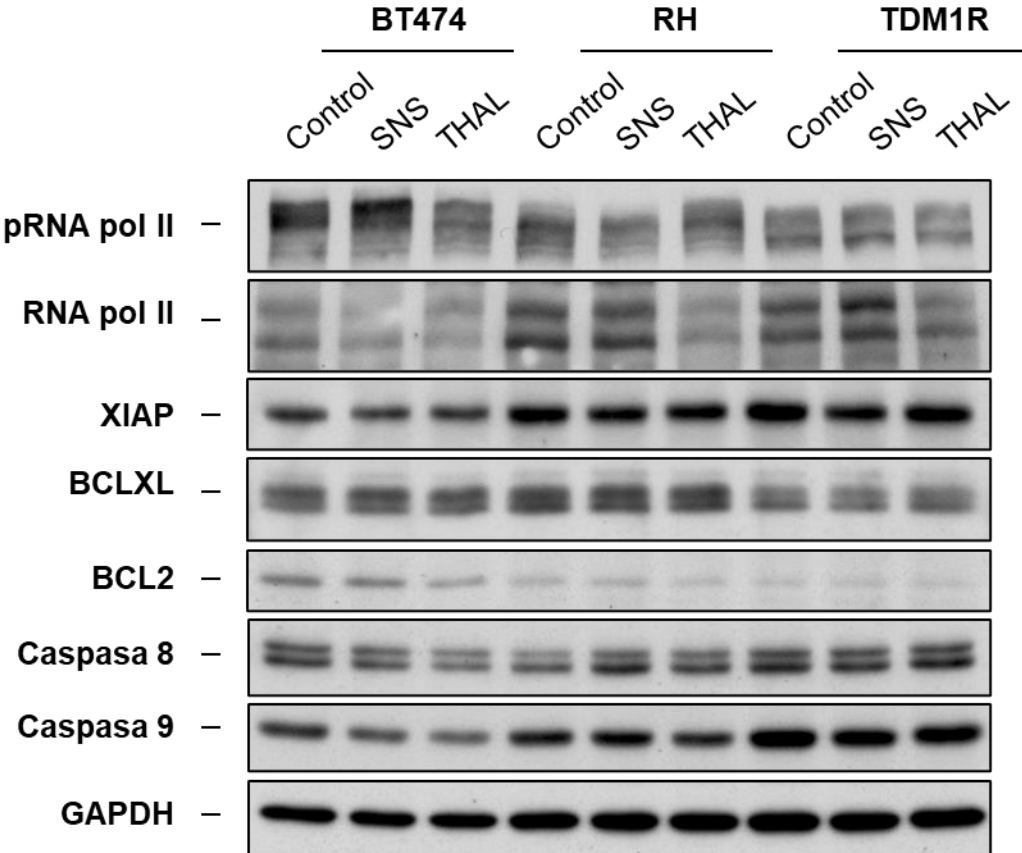

Supplement: s1 [file s1]

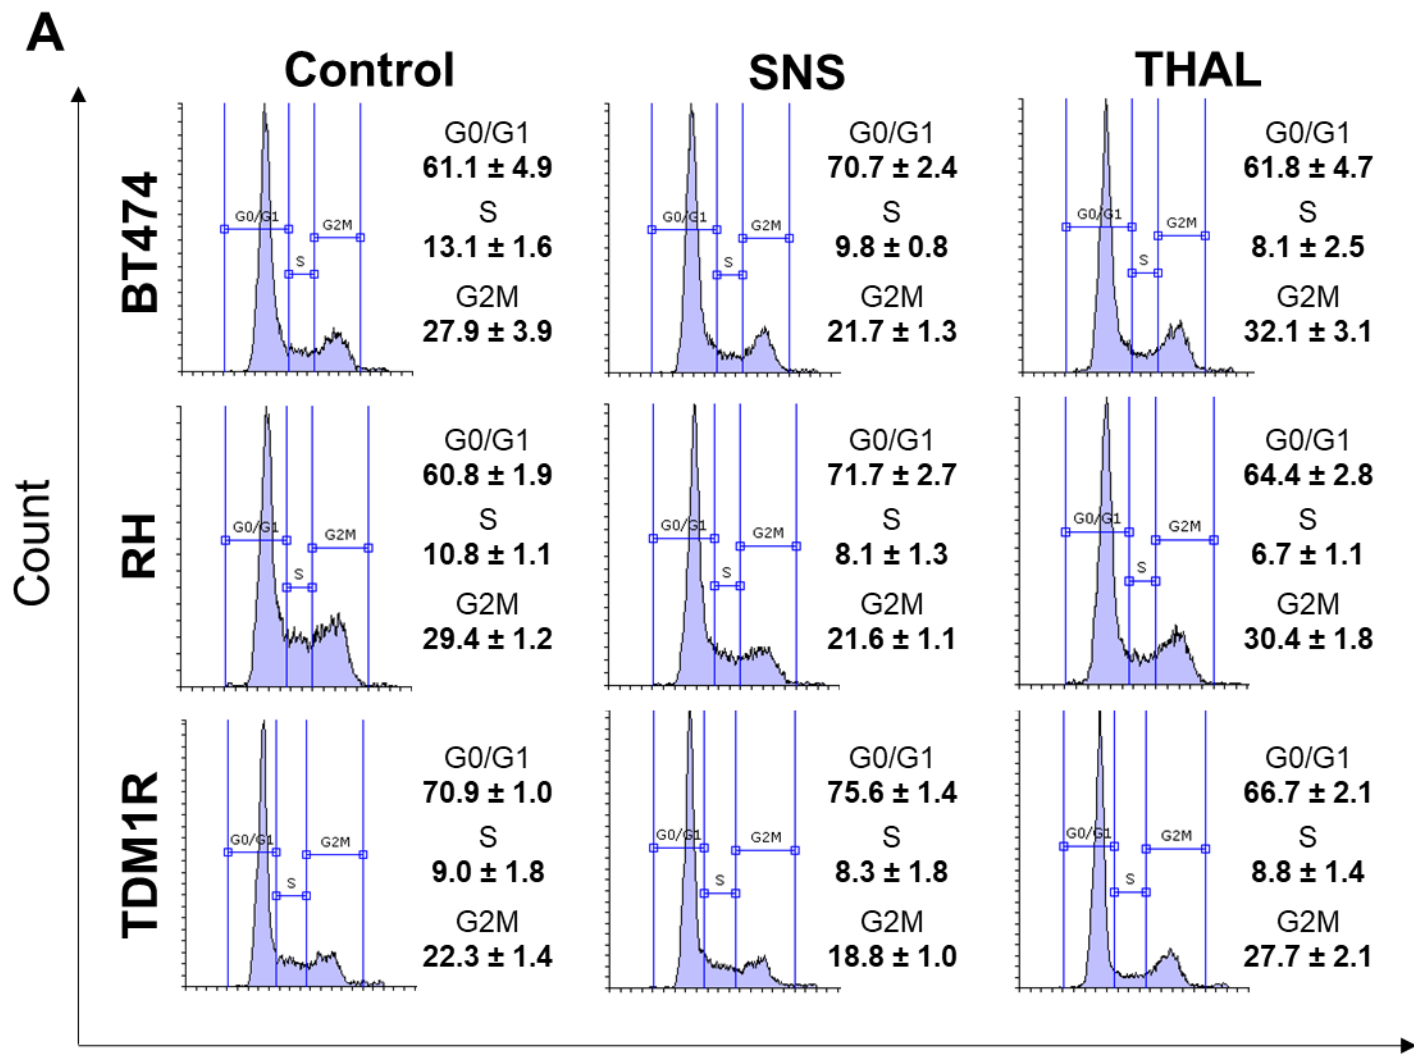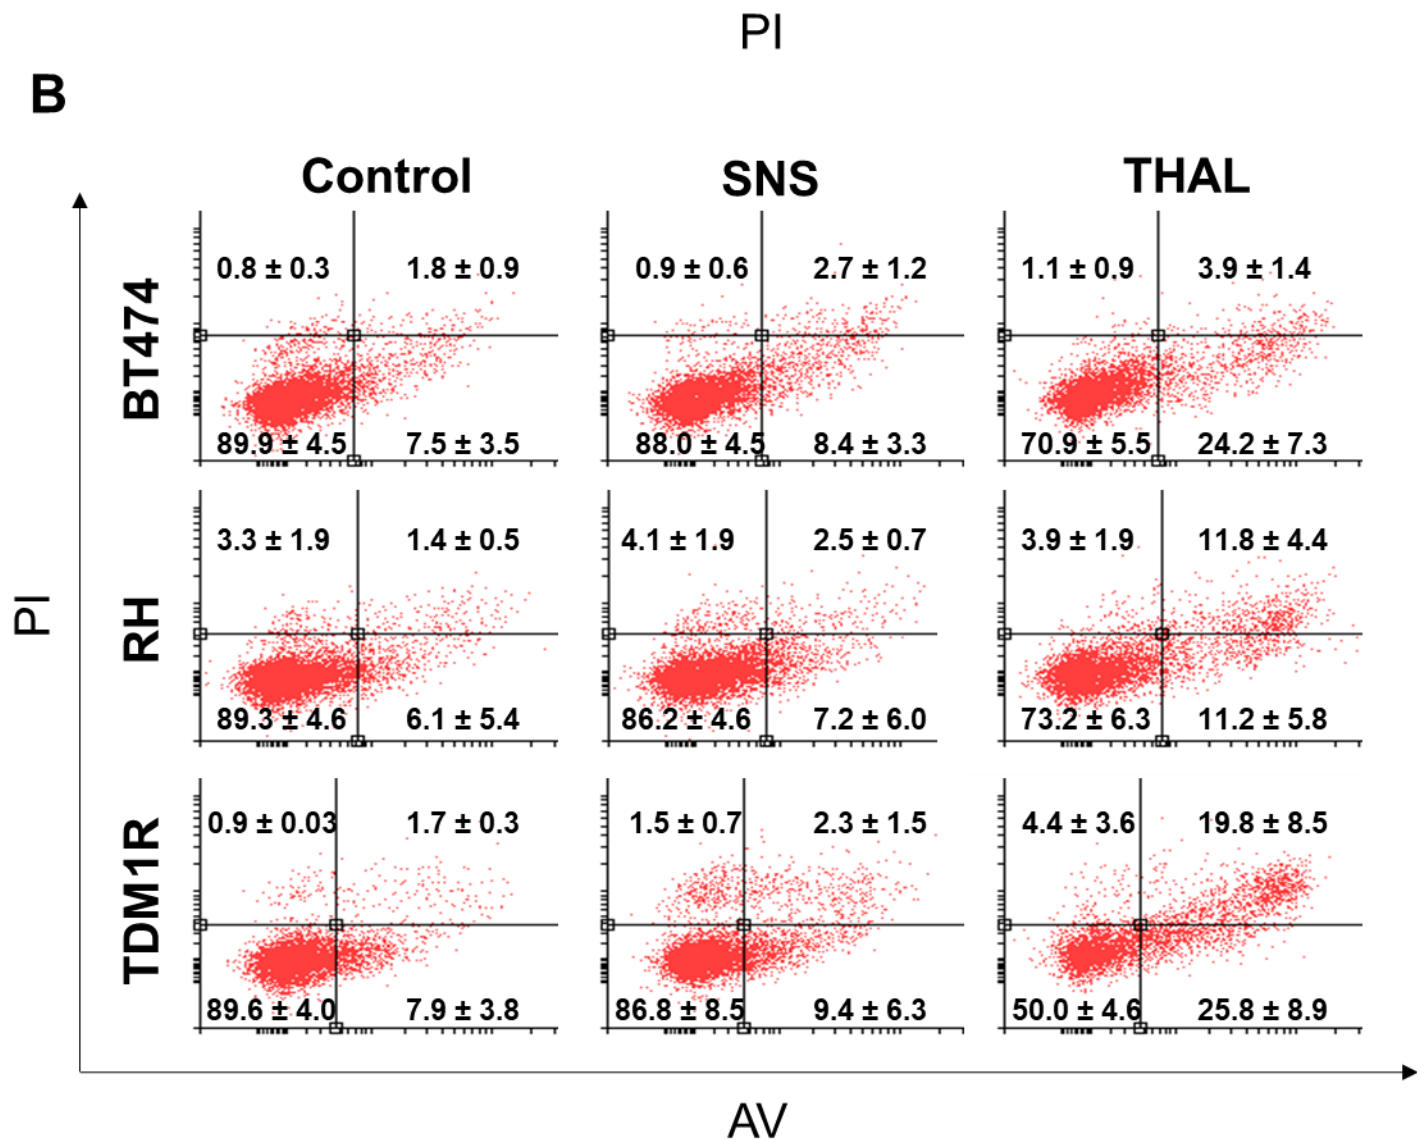

Supplement: s1 [file s1]

**A**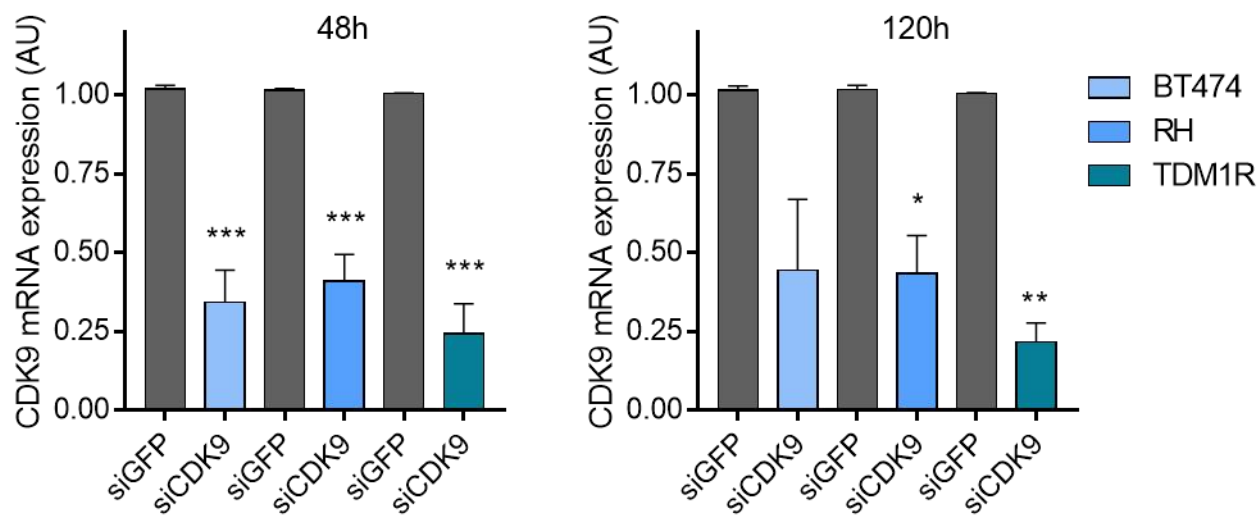**B**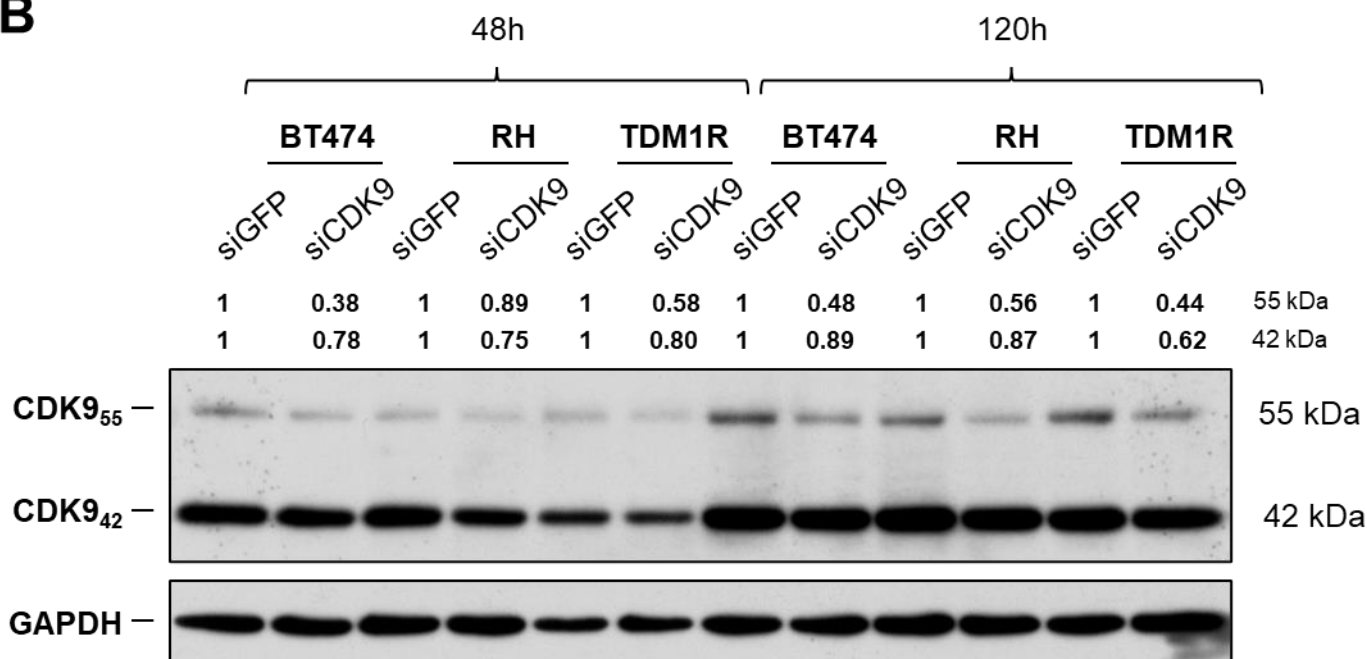**C**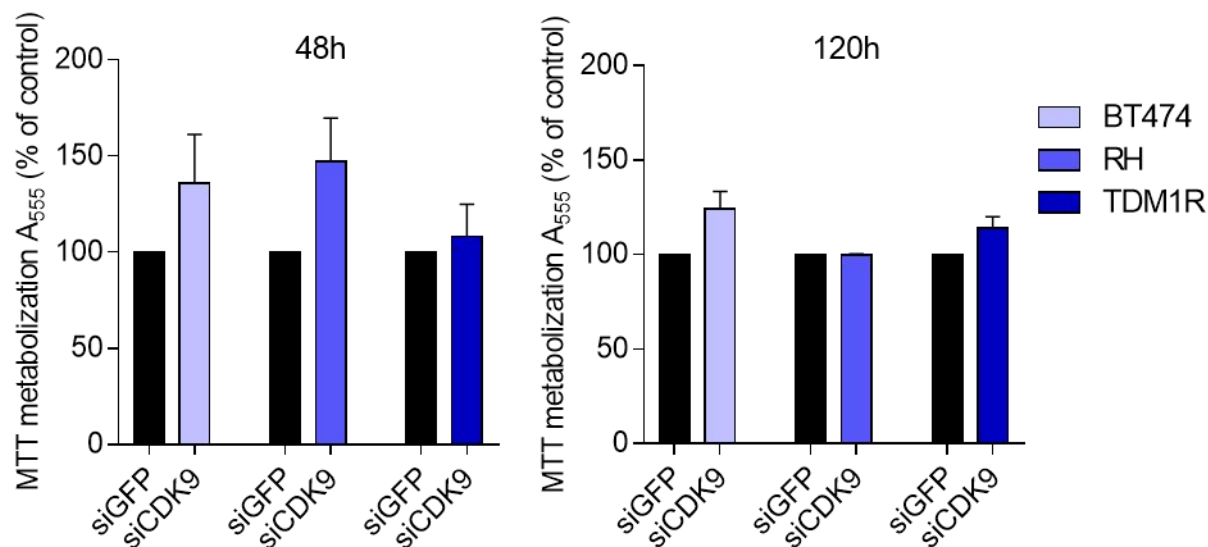

Supplement: s1 [file s1]
